# Supplementary material
Source: publisher figshare collection journal article supplement (https://tandf.figshare.com/ndownloader/files/37563587)
Supplement: Supplementary file 1 [file 37563587]

**Supplementary Material**

**Electrochemical sensor based on green-synthesized iron oxide nanomaterial modified carbon paste electrode for Congo red electroanalysis and capacitance performance**

Mary Sieugaing Tamwaa, Jacques Romain Njimoua,b, Bruno Boniface Ngueloa, Charles Péguy Nanseu-Njikia*, Ephraim Vunainc, Bankim Chandra Tripathyd, Emmanuel Ngamenia

aLaboratory of Analytical Chemistry, Faculty of Science, University of Yaounde I, P. O Box: 812 Yaounde, Cameroon

bSchool of Chemical Engineering and Mineral Industries, University of Ngaoundere, P. O Box 454 Ngaoundere, Cameroon

cDepartment of Chemistry Chancellor College, University of Malawi, P O Box 280 Zomba, Malawi

dHydro & Electrometallurgy Department, Institute of Minerals and Materials Technology, Bhubaneswar - 751 013, India

*****Corresponding author: [nanseu@yahoo.fr](mailto:nanseu@yahoo.fr)

**Fig. S1** FTIR spectra of OP and FeOP
